# Supplementary material for: Validation of Age-specific Survival Prediction in Pediatric Patients With Blunt Trauma Using Trauma and Injury Severity Score Methodology: A Ten-year Nationwide Observational Study
Source: Research Square preprint supplement (doi:10.21203/rs.3.rs-92194/v1), 2020-10-20
Supplement: Supplementary file 1 [file 9d737a0290e626974d2317a6.xlsx]

## Sheet: Table1
	Table 1. Comparison of demographic characteristics and variables by age groups
	Variables	Total n = 17 745	Neonates / Infants n = 330	Preschool children n = 2183	School children n = 5950	Adolescents n = 9282	P value
	Age, year (median IQR)	13 (8–17)	0 (0–0)	3 (2–4)	9 (7–-11)	16 (15–17)	<0.001
	Male, n (%)	12 905 (73)	219 (66)	1398 (64)	4264 (72)	7024 (76)	< 0.001
	Injury region, n (%)
	Head injury with AIS ≥ 3	6010 (34)	266 (81)	856 (39)	1987 (33)	2901 (31)	< 0.001
	Facial injury with AIS ≥ 3	173 (1)	0	12 (0.6)	43 (0.7)	118 (1)	< 0.001
	Neck injury with AIS ≥ 3	20 (0.1)	0	3 (0.1)	3 (0.1)	14 (0.2)	0.291
	Chest injury with AIS ≥ 3	3339 (19)	10 (3)	349 (16)	862 (14)	2118 (23)	< 0.001
	Abdominal and pelvic injury with AIS ≥ 3	1435 (8)	3 (0.9)	86 (4)	468 (8)	788 (8)	< 0.001
	Spinal injury with AIS ≥ 3	744 (4)	1 (0.3)	26 (1)	85 (1)	632 (7)	< 0.001
	Upper extremity injury with AIS ≥ 3	1610 (9)	0	213 (10)	846 (14)	551 (6)	< 0.001
	Lower extremity injury with AIS ≥ 3	2733 (15)	13 (4)	233 (11)	828 (14)	1659 (18)	< 0.001
	Injury Severity Score, (median IQR)	10 (6-17)	16 (9–17)	9 (5–17)	9 (8–16)	10 (6–19)	< 0.001
	Revised Trauma Score, (median IQR)	7.84 (7.55–7.84)	7.55 (6.61–7.55)	7.55 (6.90–7.84)	7.84 (7.55–7.84)	7.84 (7.55–7.84)	< 0.001
	Survival probability, (median IQR)	0.99 (0.98–0.99)	0.98 (0.95–0.99)	0.99 (0.98–0.99)	0.99 (0.99–0.99)	0.99 (0.98–0.99)	< 0.001
	Survaival probability 0.96–1.00, n (%)	15 258 (86)	238 (72)	1882 (86)	5325 (90)	7813 (84)	< 0.001
	Survaival probability 0.91–0.95, n (%)	937 (5)	48 (15)	108 (5)	270 (5)	511 (6)	< 0.001
	Survaival probability 0.76–0.90, n (%)	844 (5)	29 (9)	116 (5)	214 (4)	485 (5)	< 0.001
	Survaival probability 0.51–0.75, n (%)	344 (2)	6 (2)	34 (2)	72 (1)	232 (3)	< 0.001
	Survaival probability 0.26–0.50, n (%)	190 (1)	5 (2)	21 (1)	30 (0.5)	134 (1)	< 0.001
	Survaival probability 0.00–0.25, n (%)	172 (1)	4 (1)	22 (1)	39 (0.7)	107 (1)	0.022
	Mortality, n (%)	378 (2.1)	14 (4.2)	43 (2.0)	73 (1.2)	248 (2.7)	< 0.001
	AIS, Abbreviated Injury Scale; IQR, interquartile range

## Sheet: Table 2
	Table 2. Validation analysis and AUC of the TRISS model by age groups.
		No. of patients	Sensitivity,%	Specificity,%	PPV,%	NPV,%	Accuracy, %	AUC, (95% CI)
	Total	17745	99.5	42.3	98.8	64.3	98.3	0.978 (0.973–0.982)
	Neonates / Infants	330	99.4	28.6	96.9	66.7	96.4	0.935 (0.858–1.000)
	Preschool children	2183	99.3	34.9	98.7	50	98	0.981 (0.974–0.988)
	Schoolchildren	5950	99.7	46.6	99.3	63	99	0.979 (0.969–0.988)
	Adolescents	9282	99.4	43.2	98.5	67.3	97.9	0.977 (0.971–0.983)
	PPV, positive predictive value; NPV, negative predictive value; AUC, area under the Reciever Operator Characteristic; CI, confidence interval

## Sheet: Table 3
	Table 3. Validation analysis and and AUC of TRISS model by survaival probability interval.
		No. of patients	Sensitivity,%	Specificity,%	PPV,%	NPV,%	Accuracy, %	AUC, (95% CI)
	Total	17745	99.5	42.3	98.8	64.3	98.3	0.978 (0.973–0.982)
	0.96–1.00	15258	100	0	99.9	0	99.9	0.865 (0.820–0.911)
	0.91–0.95	937	100	0	98.2	0	98.2	0.585 (0.447–0.723)
	0.76–0.90	844	100	0	92.1	0	92.1	0.614 (0.546–0.682)
	0.51–0.75	344	100	0	76.7	0	76.7	0.585 (0.514–0.655)
	0.26–0.50	190	62.7	45	61.1	46.8	55.3	0.591 (0.509–0.673)
	0.00–0.25	172	0	100	0	72.1	72.1	0.600 (0.611–0.787)
	PPV, positive predictive value; NPV, negative predictive value; AUC, area under the Reciever Operator Characteristic; CI, confidence interval

## Sheet: Table 4
	Table 4. Observed-to-expected survivor ratio in each Ps interval by age categories.
		Ps interval	Mean Ps	No. of patients	Observed survivors	Expected survivors	Observed / Expected
	Total	0.96–1.00	0.991	15258	15248	15120.7	1.00842
		0.91–0.95	0.944	937	920	884.528	1.0401
		0.76–0.90	0.858	844	777	724.152	1.07298
		0.51–0.75	0.646	344	264	222.224	1.18799
		0.26–0.50	0.398	190	110	75.62	1.45464
		0.00–0.25	0.13	172	48	22.36	2.14669
	Neonates / Infants	0.96–1.00	0.987	238	237	234.906	1.00891
		0.91–0.95	0.946	48	47	45.408	1.03506
		0.76–0.90	0.864	29	26	25.056	1.03768
		0.51–0.75	0.612	6	3	3.672	0.816993
		0.26–0.50	0.384	5	2	1.92	1.04167
		0.00–0.25	0.163	4	1	0.652	1.53374
	Preschool children	0.96–1.00	0.99	1882	1882	1863.18	1.0101
		0.91–0.95	0.944	108	107	101.952	1.04951
		0.76–0.90	0.859	116	103	99.644	1.03368
		0.51–0.75	0.645	34	25	21.93	1.13999
		0.26–0.50	0.391	21	14	8.211	1.70503
		0.00–0.25	0.121	22	9	2.662	3.38092
	Schoolchildren	0.96–1.00	0.991	5325	5322	5277.07	1.00851
		0.91–0.95	0.945	270	263	255.15	1.03077
		0.76–0.90	0.859	214	200	183.826	1.08799
		0.51–0.75	0.644	72	62	46.368	1.33713
		0.26–0.50	0.391	30	17	11.73	1.44928
		0.00–0.25	0.131	39	13	5.109	2.54453
	Adolescents	0.96–1.00	0.991	7813	7807	7742.68	1.00831
		0.91–0.95	0.943	511	503	481.873	1.04384
		0.76–0.90	0.857	485	448	415.645	1.07784
		0.51–0.75	0.648	232	174	150.336	1.15741
		0.26–0.50	0.401	134	77	53.734	1.43298
		0.00–0.25	0.13	107	25	13.91	1.79727
	Ps, survaival probality; AUC, area under the Reciever Operator Characteristic; CI, confidence interval
